# Supplementary material for: Characterization of the Reduced IgE Binding Capacity in Boiled and Autoclaved Soybeans through Proteomic Approaches
Source: MDPI journal article supplement (doi:10.3390/foods11030479), 2022-02-07
Supplement: s1 [file s1]

**Table S1. Information of patients allergic to soybeans**

| Sample | Gender | Ethnicity | Birth Date | Soybean allergen IgE levels (kU/I) |
|--------|--------|-----------|------------|------------------------------------|
| 1      | Female | Caucasian | 04/01/1979 | 5.484                              |
| 2      | Female | American  | 09/09/1992 | 72.333                             |
| 3      | Female | American  | 09/09/1992 | 38                                 |
| 4      | Male   | Asian     | 10/14/1993 | 12.088                             |
| 5      | Female | American  | 09/09/1992 | 47.7                               |

**Table S2. The molecular weight of soybean allergens** (Amnuaycheewa & de Mejia, 2010; Pi, Sun, Fu, et al., 2021)

| Soybean allergens        | Molecular weight (kDa)                                                                 |
|--------------------------|----------------------------------------------------------------------------------------|
| Gly m 1                  | 8.3                                                                                    |
| Gly m 2                  | 8                                                                                      |
| Gly m 3                  | 14                                                                                     |
| Gly m 4                  | 17                                                                                     |
| Gly m 5                  | $\alpha$ subunit: 57-76<br>$\alpha'$ subunit: 57-83<br>$\beta$ subunit: 42-53          |
| Gly m 6                  | G1 subunit: 56<br>G2 subunit: 54<br>G3 subunit: 54<br>G4 subunit: 64<br>G5 subunit: 59 |
| Gly m 7                  | 76.2                                                                                   |
| Gly m 8                  | 28                                                                                     |
| Gly m Bd 28K (P28)       | 28                                                                                     |
| Gly m Bd 30K (P34)       | 30                                                                                     |
| Kunitz trypsin inhibitor | 20                                                                                     |

**Table S3. The information of proteins**

| Accession | Description                      | Coverage [%] | MW [kDa] |
|-----------|----------------------------------|--------------|----------|
| P0DO16    | Beta-conglycinin alpha subunit 1 | 54           | 70.3     |
| P11827    | Beta-conglycinin alpha' subunit  | 51           | 72.2     |
| P04776    | Glycinin G1                      | 51           | 55.7     |
| P25974    | Beta-conglycinin beta subunit 1  | 50           | 50.4     |
| F7J077    | Beta-conglycinin beta subunit 2  | 50           | 50.4     |
| P02858    | Glycinin G4                      | 49           | 63.8     |
| P04347    | Glycinin G5                      | 35           | 57.9     |
| P04405    | Glycinin G2                      | 33           | 54.4     |
| P11828    | Glycinin G3                      | 29           | 54.2     |

|            |                                                                                                  |    |      |
|------------|--------------------------------------------------------------------------------------------------|----|------|
| P26987     | Stress-induced protein SAM22                                                                     | 24 | 16.8 |
| A0A0R2FDV8 | DNA-binding protein HU                                                                           | 13 | 10   |
| A0A0A1M9Z2 | 30S ribosomal protein S5                                                                         | 12 | 17.9 |
| A0A5E8NL87 | Elongation factor Tu                                                                             | 11 | 43.4 |
| A0A375C1Q5 | Elongation factor Tu                                                                             | 10 | 43.1 |
| A0A063XHU6 | 50S ribosomal protein L19                                                                        | 9  | 13.4 |
| A0A5E8NN63 | 6-phosphogluconate dehydrogenase (Decarboxylating)                                               | 8  | 32.7 |
| A0A2K4ZCR6 | 50S ribosomal protein L15                                                                        | 8  | 15.6 |
| A0A5E8NNK3 | Pyruvate kinase                                                                                  | 7  | 50.4 |
| A0A375BT21 | 30S ribosomal protein S13                                                                        | 7  | 13.6 |
| A0A375BF93 | Iron-sulfur cluster assembly scaffold protein IscU                                               | 7  | 14.1 |
| A0A063XB64 | 50S ribosomal protein L5                                                                         | 7  | 20.1 |
| A0A063XB29 | Elongation factor Tu                                                                             | 7  | 43.6 |
| A0A375C644 | 2-dehydro-3-deoxy-phosphogluconate aldolase                                                      | 6  | 21.6 |
| I8IE20     | Calmodulin                                                                                       | 5  | 17   |
| A0A6I7CXS1 | Ribonuclease YeeF                                                                                | 5  | 21.6 |
| A0A5E8NKS0 | ATP-dependent Clp protease ATP-binding subunit                                                   | 5  | 76.9 |
| A0A410ZVW4 | Chaperone protein DnaK                                                                           | 4  | 65.9 |
| A0A375DUA1 | Response regulator in two-component regulatory system with CopS, regulation of copper resistance | 4  | 25.6 |
| A0A375BT57 | 50S ribosomal protein L2                                                                         | 4  | 30.1 |
| A0A375BBT8 | ATP synthase subunit beta                                                                        | 4  | 50.8 |
| A0A2K4ZIL3 | 30S ribosomal protein S2                                                                         | 4  | 28.2 |
| I8U0Z5     | Molecular chaperones HSP70/HSC70, HSP70 superfamily                                              | 3  | 69.7 |
| A0A375CH53 | Elongation factor G                                                                              | 3  | 77.8 |
| A0A375CDG7 | Putative type I secretion system outer membrane efflux transmembrane protein                     | 3  | 53.4 |
| A0A375CA40 | Flagellin                                                                                        | 3  | 44.9 |
| A0A375BFG8 | Ketol-acid reductoisomerase (NADP(+))                                                            | 3  | 36.6 |
| A0A164WWR4 | Trigger factor                                                                                   | 3  | 47.5 |
| I8U0C5     | Elongation factor 1-alpha                                                                        | 2  | 50   |
| I8I9W5     | ATP synthase subunit alpha                                                                       | 2  | 59.9 |
| A0A5E8NP70 | Glucose-6-phosphate 1-dehydrogenase                                                              | 2  | 55.1 |
| A0A5E8NKK6 | Glyceraldehyde-3-phosphate dehydrogenase                                                         | 2  | 35.7 |
| A0A375BVD9 | 60 kDa chaperonin                                                                                | 2  | 57.4 |

|            |                                                        |   |       |
|------------|--------------------------------------------------------|---|-------|
| A0A375BUT8 | Putative ACYL-CoA DEHYDROGENASE OXIDOREDUCTASE         | 2 | 65.3  |
| A0A375BER7 | Succinate-semialdehyde dehydrogenase I, NADP-dependent | 2 | 51.5  |
| A0A375BBA9 | Succinate--CoA ligase [ADP-forming] subunit beta       | 2 | 41.2  |
| A0A375B8Y2 | ATP synthase subunit alpha                             | 2 | 55.4  |
| A0A375B8J0 | Adenosylhomocysteinase                                 | 2 | 51.9  |
| A0A2K4ZPJ1 | Neopullulanase                                         | 2 | 71.6  |
| A0A2K4ZLR1 | Formate acetyltransferase                              | 2 | 76.1  |
| A0A1K0FDI3 | Phosphoketolase                                        | 2 | 92.2  |
| A0A1K0ET72 | Trigger factor                                         | 2 | 46.3  |
| A0A1K0ERM9 | Phosphoglycerate kinase                                | 2 | 43.1  |
| A0A0R2FCT6 | GTP-binding protein                                    | 2 | 68.4  |
| A0A0R2F2Q4 | ATP synthase subunit beta                              | 2 | 50.3  |
| I8A836     | Enoyl reductase domain of FAS1                         | 1 | 198.4 |
| A0A375BT51 | DNA-directed RNA polymerase subunit beta'              | 1 | 155.8 |
| A0A2K4ZMM8 | Chaperone protein HtpG                                 | 1 | 106.7 |
| A0A2K4ZJ99 | ATP-dependent Clp protease ATP-binding subunit ClpC    | 1 | 90.8  |
| A0A2K4ZHA5 | DNA-directed RNA polymerase subunit beta'              | 1 | 140.1 |

**Table S4. Changes in epitopes in Gly m 4 and Gly m 5 among extracted proteins from raw, boiled and autoclaved soybeans**

| Amino acid sequence         | Abundance   |                |                    | Allergens                   |
|-----------------------------|-------------|----------------|--------------------|-----------------------------|
|                             | Raw soybean | Boiled soybean | Autoclaved soybean |                             |
| ALVTDADNVIPK                | 367.7       | 10.5           | 19.7               | Gly m 4                     |
| SVENVEGNNGPGTIK             | 407.4       | 8.6            | 5                  |                             |
| SVENVEGNNGPGTIKK            | 514.3       | 12.9           | 23                 |                             |
| VEKEECEGEIPRPRRPQHPR        | 0           | 29.4           | 0                  | $\alpha$ subunit of Gly m 5 |
| EECEEGEIPRPRRPQHPR          | 1.4         | 22.1           | 0                  |                             |
| EPQQPGEKEEDEDEQPRPIPFPRPQPR | 62.6        | 76.2           | 259.2              |                             |
| EEDEDEQPRPIPFPRPQPR         | 56.2        | 88.4           | 6.1                |                             |
| EEQEWPRKEEK                 | 32.5        | 88.1           | 65.8               |                             |
| EEQEWPR                     | 88.9        | 59.5           | 80.4               |                             |
| EEQEWPRK                    | 29.8        | 41.8           | 17.5               |                             |
| GSEEEDEDEDEEQDER            | 311.2       | 56.4           | 14.7               |                             |
| QFPFPRPPHQK                 | 78.7        | 30.3           | 259.1              |                             |
| QFPFPRPPHQKEER              | 137.7       | 5.2            | 32                 |                             |
| KQEEDEDEEQQR                | 68.6        | 129.7          | 36.1               |                             |
| QEEDEDEEQQR                 | 135.4       | 108.4          | 0                  |                             |

|                       |       |       |       |                                  |
|-----------------------|-------|-------|-------|----------------------------------|
| ESEESDSELR            | 616   | 0     | 0     |                                  |
| ESEESDSELR            | 575.7 | 0     | 0     |                                  |
| NKNPFLFGSNR           | 477.1 | 8.2   | 56.4  |                                  |
| NPFLFGSNRFETLTK       | 566.4 | 0     | 0     |                                  |
| NPFLFGSNR             | 296.2 | 3.3   | 29.1  |                                  |
| LQSGDALR              | 165.6 | 58.2  | 25.9  |                                  |
| VPSGTTYVVPDNNENLR     | 572.9 | 0     | 0     |                                  |
| VLFSREEGQQQGEQR       | 309.9 | 0     | 0     |                                  |
| KTISSDCKPFNLR         | 783.9 | 0     | 0     |                                  |
| TISSDCKPFNLR          | 548.8 | 1.4   | 4.3   |                                  |
| SRDPIYSNK             | 491.5 | 12.7  | 2.8   |                                  |
| DPIYSNK               | 437.8 | 0     | 0     |                                  |
| FFEITPEKNPQLR         | 473.8 | 19.3  | 6     |                                  |
| FFEITPEK              | 283.2 | 37.9  | 16.1  |                                  |
| EQQQEQQQEQPLEVRK      | 183.6 | 52.7  | 0     |                                  |
| EQQQEQQQEQPLEVR       | 195.3 | 33.7  | 11.7  |                                  |
| ESYFVDAQPK            | 308.9 | 0     | 153.1 |                                  |
| VEEEECGQIPRPRQHPER    | 54.7  | 53    | 6.2   | $\alpha'$ subunit<br>of Gly m 5  |
| QQHGEKEEDEGEQPRPFPRPR | 8     | 2.3   | 845.1 |                                  |
| EDEGEQPRPFPRPR        | 29.8  | 64.6  | 9.3   |                                  |
| EHPRPHQPHQKEEK        | 14.2  | 8.6   | 370.3 |                                  |
| EEKHEWQHK             | 108.3 | 81.6  | 187.7 |                                  |
| EEKHEWQHKQEK          | 54.2  | 102.5 | 0     |                                  |
| ESEEEEDQDEDEEQDK      | 207.6 | 9.9   | 0     |                                  |
| VLFGRGEGQQQGEER       | 87.9  | 28.1  | 0     |                                  |
| KTISSDCKPFNLR         | 783.9 | 0     | 0     |                                  |
| TISSDCKPFNLR          | 548.8 | 1.4   | 4.3   |                                  |
| LFEITPEKNPQLR         | 543.5 | 12.4  | 4.7   |                                  |
| LFEITPEK              | 334.1 | 34.9  | 22.8  |                                  |
| QQQEQPLEVR            | 272.7 | 26.9  | 14.4  |                                  |
| QQQEQPLEVRK           | 361.6 | 0     | 0     |                                  |
| LAIPVKNPGR            | 118.6 | 102.6 | 27    | $\beta$ -subunit 1<br>of Gly m 5 |
| QQEGVIVELSK           | 843.7 | 0     | 20.5  |                                  |
| TISSDEPFNLR           | 610.9 | 0     | 0     |                                  |
| SRNPIYSNNFGK          | 883.6 | 0     | 0     |                                  |
| NPIYSNNFGK            | 495.4 | 0     | 0     |                                  |
| FFEITPEKNPQLR         | 473.8 | 19.3  | 6     |                                  |
| FFEITPEK              | 283.2 | 37.9  | 16.1  |                                  |
| QKQEEPLEVQR           | 295.9 | 50.3  | 75.6  |                                  |
| QEEPLEVQR             | 342.7 | 70.6  | 18.3  |                                  |
| AILTLVNDDRDSYNLHPGDAQ | 834.1 | 2.4   | 0     | $\beta$ -subunit 2<br>of Gly m 5 |
| AILTLVNDDR            | 467   | 17.1  | 7.4   |                                  |
| LAIPVKNPGR            | 118.6 | 102.6 | 27    |                                  |
| VLLGEEEQ              | 240.5 | 74.7  | 17.5  |                                  |
| VLLGEEEQQQEGVIVELSK   | 663.2 | 0     | 0     |                                  |
| QQEGVIVELSK           | 843.7 | 0     | 20.5  |                                  |
| TISSDEPFNLR           | 610.9 | 0     | 0     |                                  |
| SRNPIYSNNFGK          | 883.6 | 0     | 0     |                                  |

|               |         |        |        |  |
|---------------|---------|--------|--------|--|
| NPIYSNNFGK    | 495.4   | 0      | 0      |  |
| FFEITPEKNPQLR | 473.8   | 19.3   | 6      |  |
| FFEITPEK      | 283.2   | 37.9   | 16.1   |  |
| QKQEEEEPLEVQR | 295.9   | 50.3   | 75.6   |  |
| QEEEEPLEVQR   | 342.7   | 70.6   | 18.3   |  |
| Total         | 23888.7 | 2076.7 | 2940.7 |  |
